# Supplementary material
Source: Springer Nature journal article supplement (https://www.springermedizin.de/resource/supplementary/12936_2011_2104_MOESM3_ESM.pdf/9543370)
Supplement: MOESM3 [file 9543370]

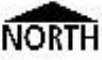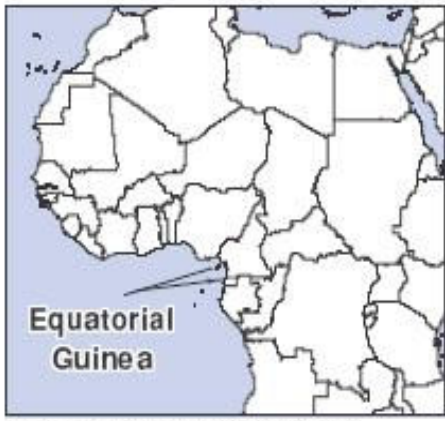

Data Sources: Marathon Oil, Medical Care Development International, African Data Sampler, Medical Research Council SA

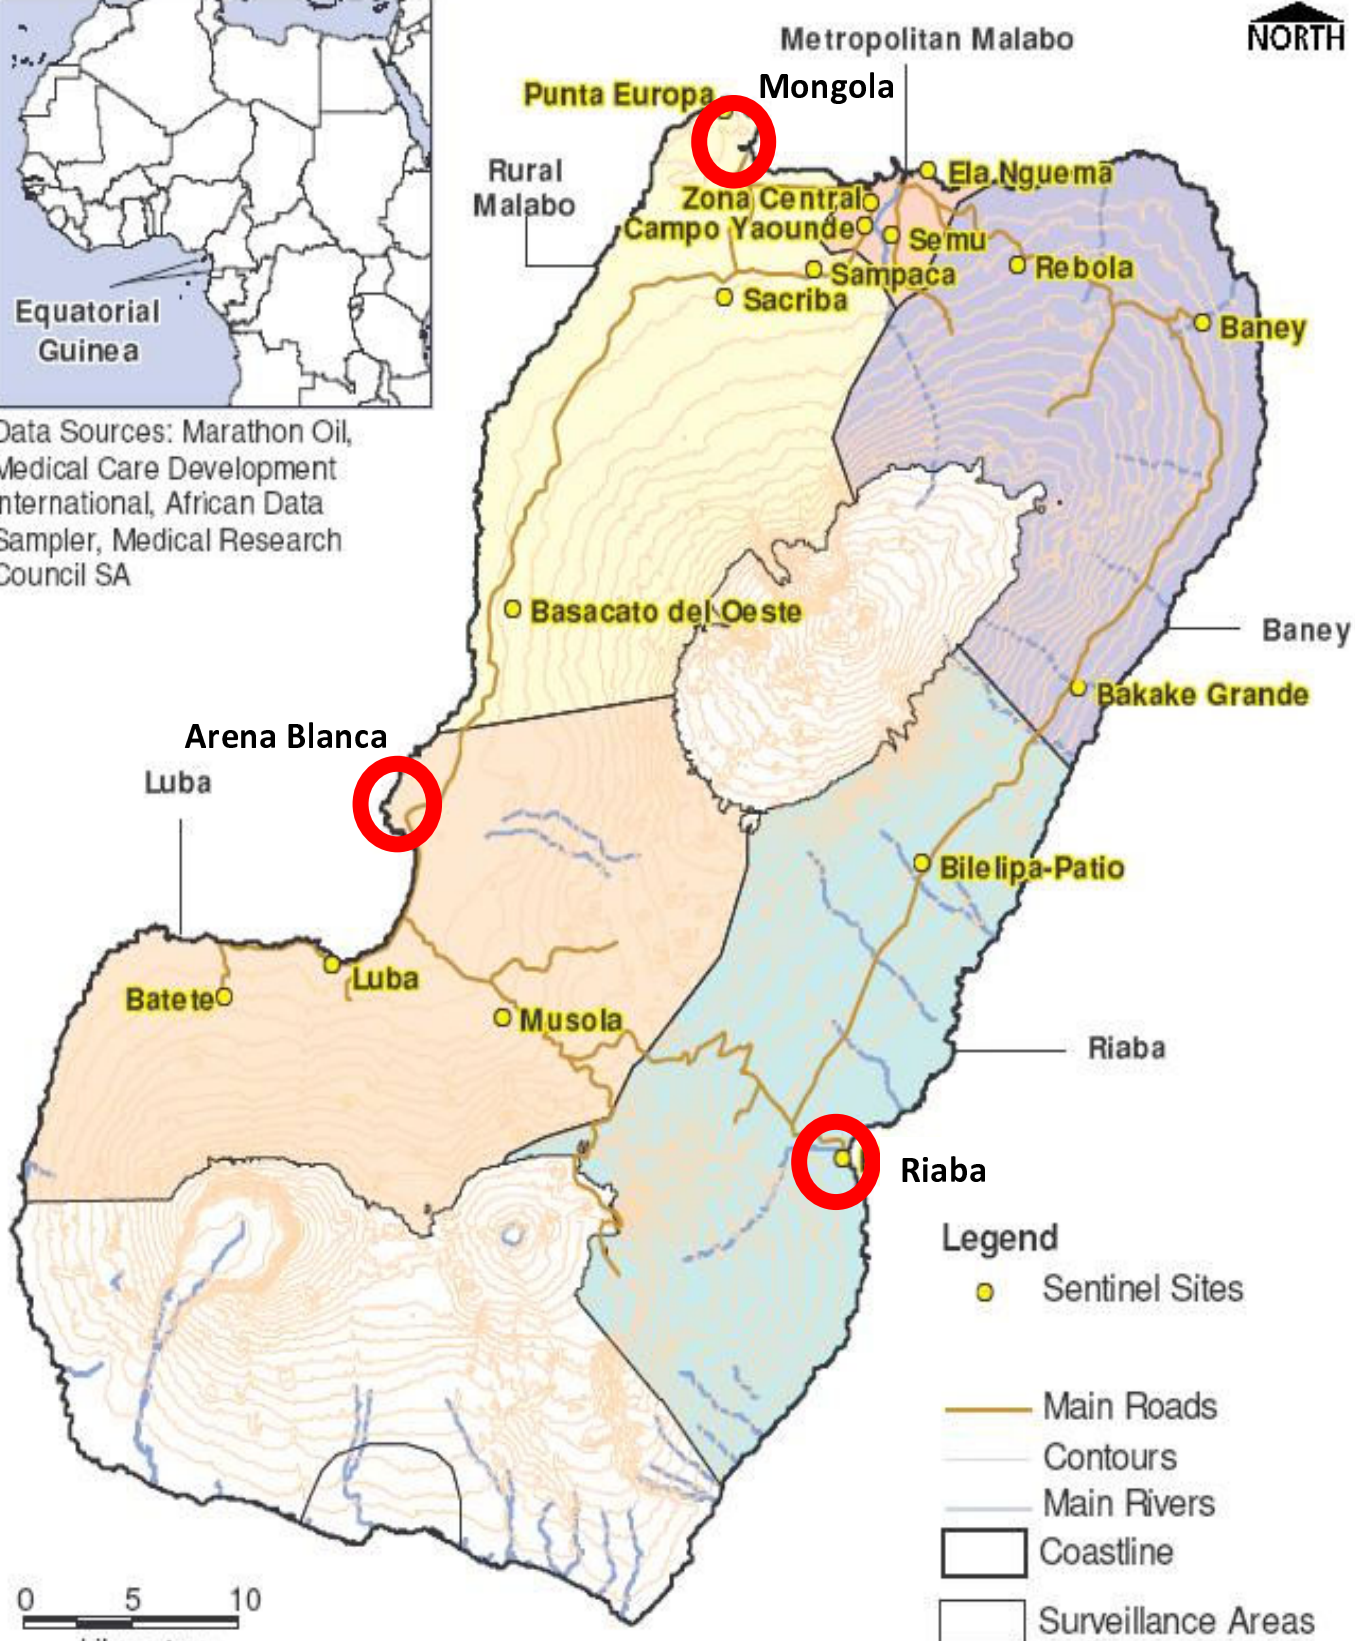

Punta Europa

Mongola

Metropolitan Malabo

Rural Malabo

Zona Central  
Campo Yaounde

Ela Nguema

Semu

Rebola

Sampaca

Sacriba

Baney

Basacato del Oeste

Baney

Bakake Grande

Arena Blanca

Luba

Bilelipa-Patio

Batete

Luba

Musola

Riaba

Riaba

Legend

● Sentinel Sites

— Main Roads

— Contours

— Main Rivers

□ Coastline

□ Surveillance Areas

0 5 10

kilometers
